# Supplementary material for: Anti-Mutagenic and Immunomodulatory Effects of Astragali Radix Extract on a Cyclophosphamide-Induced Immunosuppressed Mouse Model
Source: MDPI journal article supplement (doi:10.3390/app13052959), 2023-02-25
Supplement: s1 [file s1]

Supplementary Material

# Anti-Mutagenic and Immunomodulatory Effects of Astragali Radix Extract on a Cyclophosphamide-Induced Immunosuppressed Mouse Model

Hye-Rim Park <sup>1†</sup>, Joo Wan Kim <sup>2†</sup>, Jung-Ok Lee <sup>3</sup>, Jong-Deuk Ahn <sup>3</sup>, Min-Cheol Yang <sup>3</sup>, Khawaja Muhammad Imran Bashir <sup>4,\*</sup>, Jae-Suk Choi <sup>5\*</sup> and Sae-Kwang Ku <sup>1\*</sup>

<sup>1</sup> Department of Anatomy and Histology, College of Korean Medicine, Daegu Haany University, Gyeongsan 38610, Republic of Korea; hrpark@nutracore.co.kr (H.-R.P.)

<sup>2</sup> Department of Companion Animal Health, Daegu Haany University, Gyeongsan 38610, Republic of Korea; dym\_jkkm@dhu.ac.kr

<sup>3</sup> ARIBIO H&B Co., Ltd., Jecheon 27116, Republic of Korea; ceo@aribiohnb.com (J.-O.L.); jdahn@aribiohnb.com (J.-D.A.); mcyang@aribiohnb.com (M.-C.Y.)

<sup>4</sup> German Engineering Research Center for Life Science Technologies in Medicine and Environment, 31, Gwahaksandan 1-ro, 60 Beon-Gil, Gangseo-gu, Busan 46742, Republic of Korea

<sup>5</sup> Department of Seafood Science and Technology, The Institute of Marine Industry, Gyeongsang National University, 2-9, Tongyeonghaean-ro, Tongyeong, Gyeongsangnam-do, 53064, Republic of Korea

# H.-R.P. and J.W.K. contributed equally

\* Correspondence: imran.bashir@lstme.org (K.M.I.B.); jsc1008@gnu.ac.kr (J.-S.C.); gucci200@hanmail.net (S.-K.K.); Tel.: +82-51-899-8054 (K.M.I.B.); +82-55-772-9142 (J.-S.C.); +82-53-819-1549 (S.-K.K.)

† These authors contributed equally to this work.

**Table S1.** Specific conditions for HPLC analysis.

| Item       | HPLC Analysis Condition                                       |                                             |        |
|------------|---------------------------------------------------------------|---------------------------------------------|--------|
| Column     | Capcellpak C18 UG120 (Osakasoda Co., Japan), 4.6×250 mm, 5 μm |                                             |        |
| Injection  | 10 μL                                                         | Column temp.                                | 35 °C  |
| Flow       | 1.0 mL/min                                                    | Wavelength                                  | 260 nm |
| Time (min) | Mobile Phase                                                  |                                             |        |
|            | A<br>(0.1% Phosphoric acid H <sub>2</sub> O, %)               | B<br>(0.1% Phosphoric acid Acetonitrile, %) |        |
| 0          | 87                                                            | 13                                          |        |
| 30         | 87                                                            | 13                                          |        |
| 31         | 0                                                             | 100                                         |        |
| 41         | 0                                                             | 100                                         |        |
| 42         | 87                                                            | 13                                          |        |
| 52         | 87                                                            | 13                                          |        |

**Table S2.** Oligonucleotides used for real time RT-PCR.

| Target         | 5' – 3'   | Sequence                  | NCBI accession No. |
|----------------|-----------|---------------------------|--------------------|
| NF-κB          | Sense     | CAATGGCTACACAGGACCA       | NM_008689          |
|                | Antisense | CACTGTCACCTGGAACCAGA      |                    |
| Interferon-γ   | Sense     | GTTACTGCCACGGCACAGTCATTG  | NM_008337          |
|                | Antisense | ACCATCCTTTTGCCAGTTCCTCCAG |                    |
| TNF-α          | Sense     | CCTGTAGCCCACGTCGTAGC      | NM_013693          |
|                | Antisense | TTGACCTCAGCGCTGAGTTG      |                    |
| Interleukin-1β | Sense     | AGCTGTGGCAGCTACCTGTG      | NM_008361          |
|                | Antisense | GCTCTGCTTGTGAGGTGCTG      |                    |
| Interleukin-6  | Sense     | TCTTGGGACTGATGCTGGTGAC    | NM_031168          |
|                | Antisense | GCAGCTCCCTCTTGTGT         |                    |
| Interleukin-12 | Sense     | CAGGTGTCTTAGCCAGTCC       | NM_008354          |
|                | Antisense | CATAACGCACTAGGTTTGCCGA    |                    |
| GAPDH          | Sense     | CATCTTCCAGGAGCGAGACC      | NM_008084          |
|                | Antisense | TCCACCACCCTGTTGCTGTA      |                    |

NCBI = National Center for Biotechnology Information; real time RT-PCR = Real time reverse transcription polymerase chain reaction; NF-κB = Nuclear factor kappa B; TNF = Tumor necrosis factor; GAPDH = Glycer-aldehyde 3-phosphate dehydrogenase

**Table S3.** Primary antisera and immunohistochemistry detection kits used in this study.

| Antisera or detection kits                             | Code      | Source                                 | Dilution |
|--------------------------------------------------------|-----------|----------------------------------------|----------|
| <b>Primary antisera*</b>                               |           |                                        |          |
| Anti-tumor necrosis factor- $\alpha$ antibody          | sc-130349 | Santa Cruz Biotechnology <sup>1)</sup> | 1:200    |
| Anti-nitric oxide synthase2 (N-20) polyclonal antibody | sc-651    | Santa Cruz Biotechnology               | 1:100    |
| Anti-interleukin-1 $\beta$ (H-153) polyclonal antibody | sc-7884   | Santa Cruz Biotechnology               | 1:100    |
| Anti-CD3 (PC3/188A) antibody                           | sc-20047  | Santa Cruz Biotechnology               | 1:100    |
| Anti-CD4 (H-370) antibody                              | sc-7219   | Santa Cruz Biotechnology               | 1:100    |
| Anti-CD8 polyclonal antibody                           | ab4055    | Abcam <sup>2)</sup>                    | 1:100    |
| <b>Detection kits</b>                                  |           |                                        |          |
| Vectastain Elite ABC Kit                               | PK-6200   | Vector Lab. Inc. <sup>3)</sup>         | 1:50     |
| Peroxidase substrate Kit                               | SK-4100   | Vector Lab. Inc.                       | 1:50     |

\*All antisera were diluted using 0.01 M phosphate buffered saline; CD = Cluster of differentiation; ABC= avidin-biotin-peroxidase complex; <sup>1)</sup> Santa Cruz Biotechnology (Santa Cruz, CA, USA); <sup>2)</sup> Abcam, Cambridge, UK; <sup>3)</sup> Vector Lab. Inc., Burlingame, CA, USA)

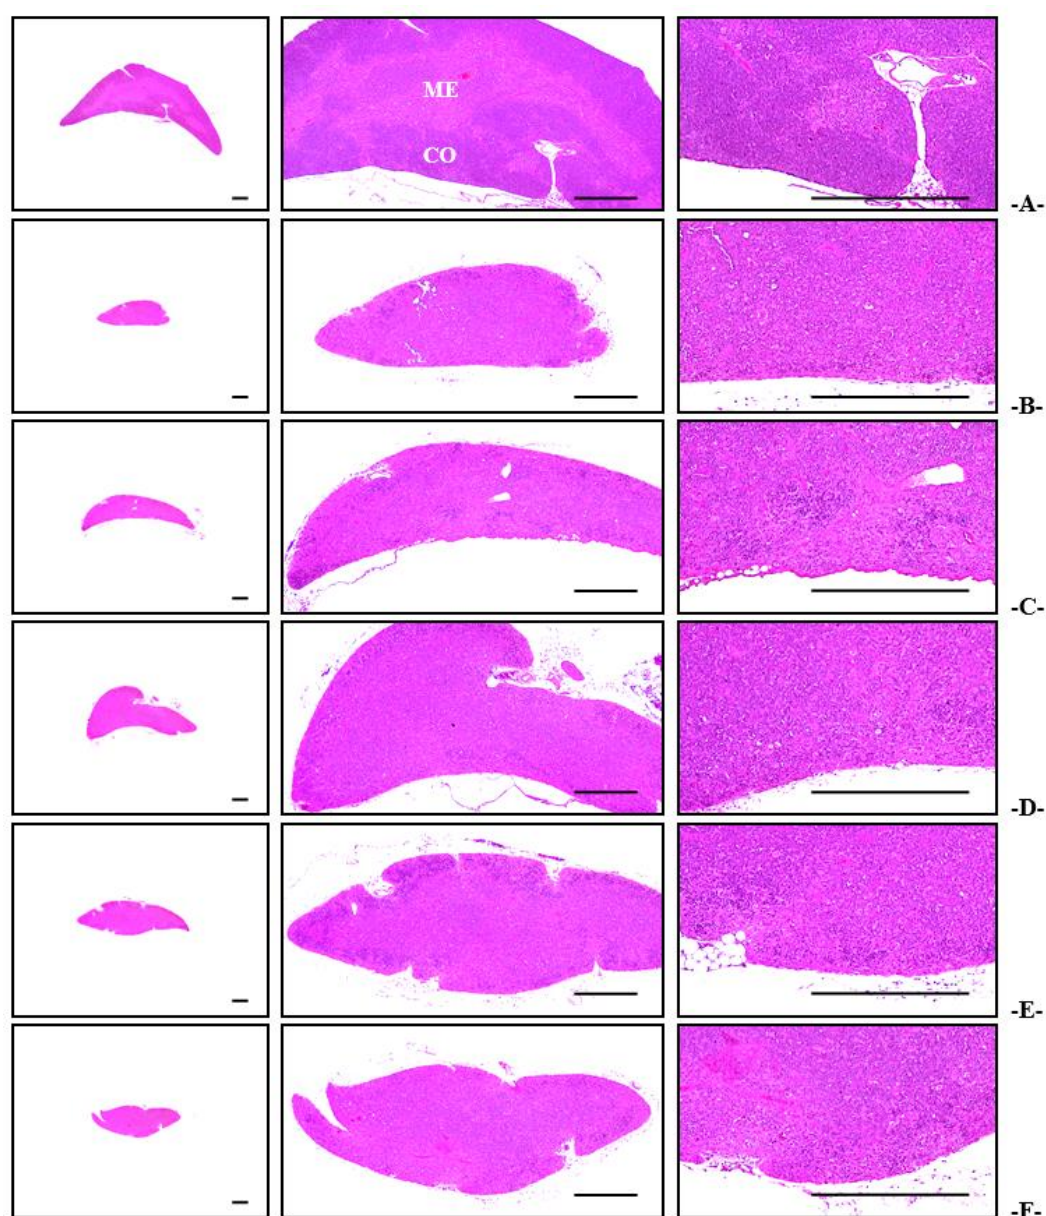

**Figure S1.** Representative histopathological images of the thymus obtained from intact or CPA-induced immunosuppressed mice.

**A** = Intact vehicle control: Distilled water administered intact mice; **B** = CPA control: Cyclophosphamide treated and distilled water administered control mice; **C** = EAP<sub>200</sub>: CPA treated and *A. pullulans* purified exopolymers (EAP at a dose of 200 mg/kg) administered mice; **D** = AR<sub>400</sub>: CPA treated and AR (400 mg/kg) administered mice; **E** = AR<sub>200</sub>: CPA treated and AR (200 mg/kg) administered mice; **F** = AR<sub>100</sub>: CPA treated and AR (100 mg/kg) administered mice; AR = Astragali Radix (Roots of *A. membranaceus* Bunge) extracts; CO = cortex; ME = medulla; All Hematoxylin-Eosin stain; Scale bar = 400  $\mu$ m

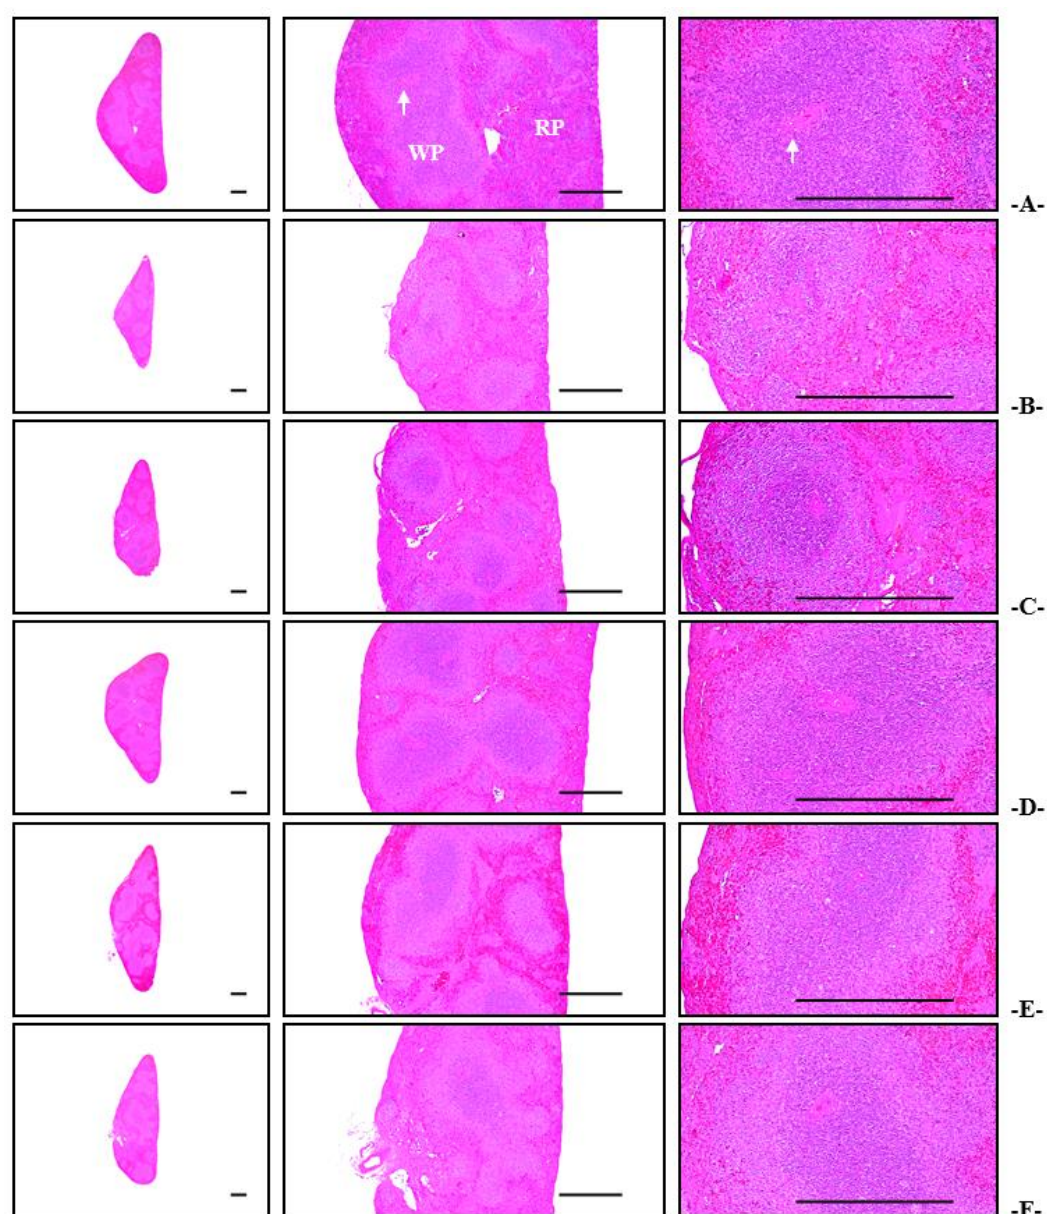

**Figure S2.** Representative histopathological images of the spleen, taken from intact or CPA-induced immunosuppressed mice.

**A** = Intact vehicle control: Distilled water administered intact mice; **B** = CPA control: Cyclophosphamide treated and distilled water administered control mice; **C** = EAP<sub>200</sub>: CPA treated and *A. pullulans* purified exopolymers (EAP at a dose of 200 mg/kg) administered mice; **D** = AR<sub>400</sub>: CPA treated and AR (400 mg/kg) administered mice; **E** = AR<sub>200</sub>: CPA treated and AR (200 mg/kg) administered mice; **F** = AR<sub>100</sub>: CPA treated and AR (100 mg/kg) administered mice; AR = Astragali Radix (Roots of *A. membranaceus* Bunge) extracts; WP = white pulp; RP = red pulps; Arrow = central arteriole; All Hematoxylin-Eosin stain; Scale bar = 400  $\mu$ m



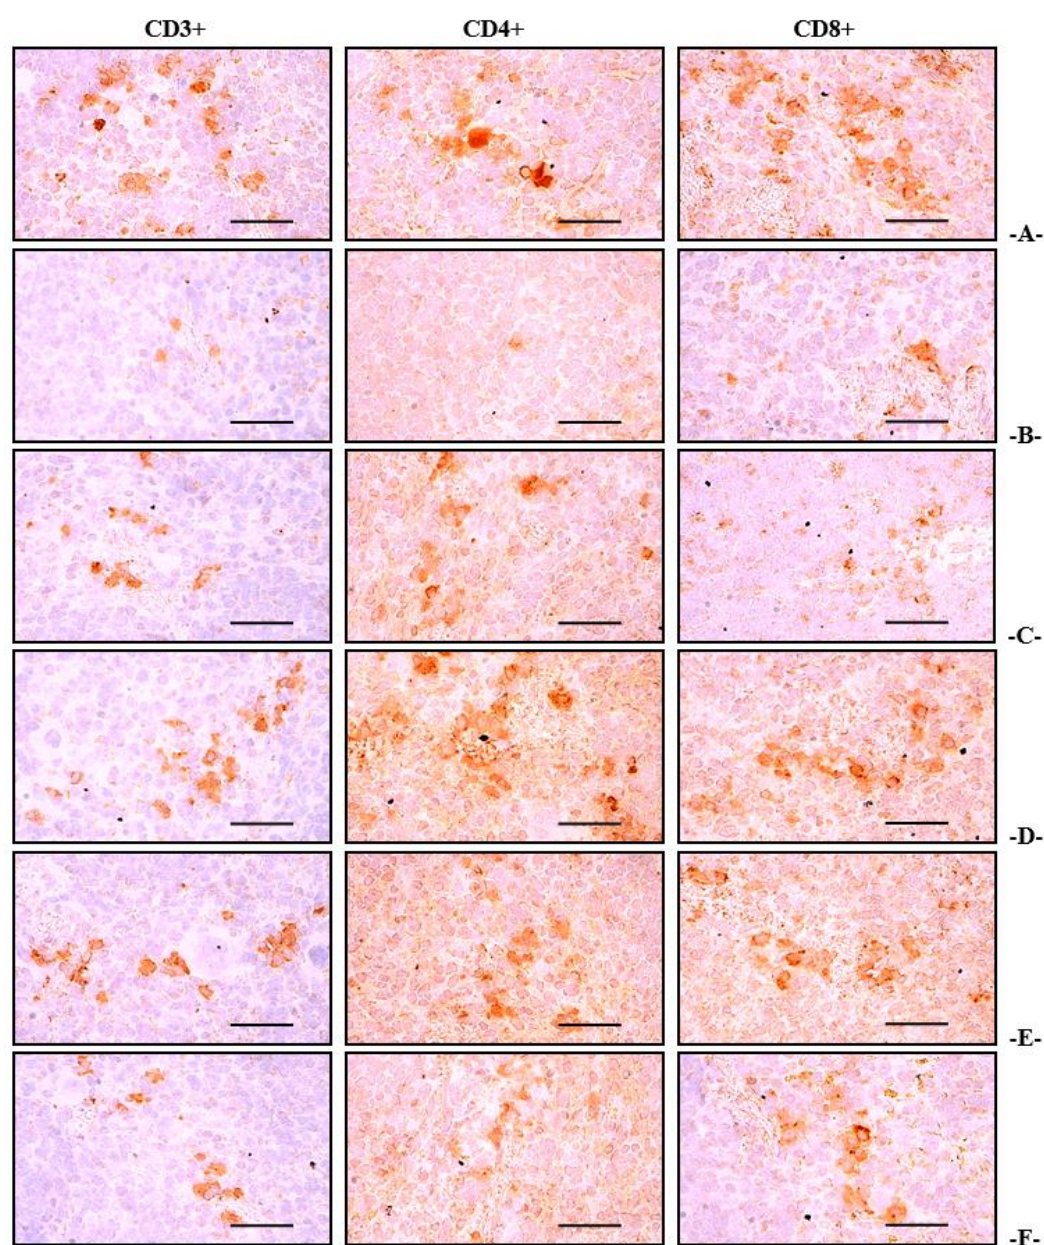

**Figure S3.** Representative immunohistochemical images of the CD3+, CD4+ and CD8+ Cells on the spleen obtained from intact or CPA-induced immunosuppressed mice.

**A** = Intact vehicle control: Distilled water administered intact mice; **B** = CPA control: Cyclophosphamide treated and distilled water administered control mice; **C** = EAP<sub>200</sub>: CPA treated and *A. pullulans* purified exopolymers (EAP at a dose of 200 mg/kg) administered mice; **D** = AR<sub>400</sub>: CPA treated and AR (400 mg/kg) administered mice; **E** = AR<sub>200</sub>: CPA treated and AR (200 mg/kg) administered mice; **F** = AR<sub>100</sub>: CPA treated and AR (100 mg/kg) administered mice; AR = Astragali Radix (Roots of *A. membranaceus* Bunge) extracts; CD = Cluster of differentiation; ABC = Avidin-biotin-peroxidase complex; All ABC-based immunohistochemical stain; Scale bar = 50  $\mu$ m

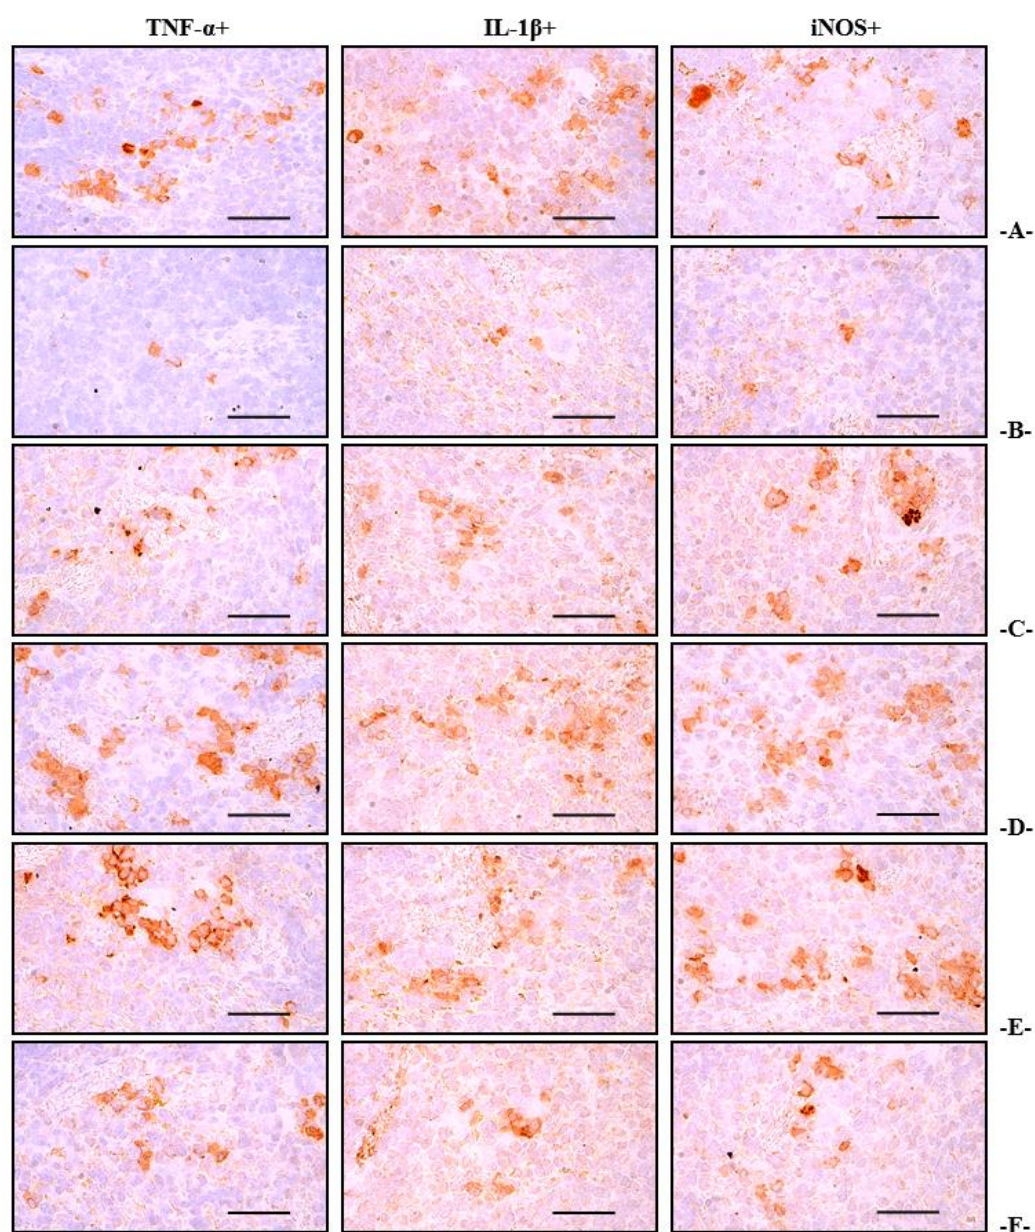

**Figure S4.** Representative immunohistochemical images of the TNF- $\alpha$ +, IL-1 $\beta$ + and iNOS+ cells on the spleen obtained from intact or CPA-induced immunosuppressed mice.

**A** = Intact vehicle control: Distilled water administered intact mice; **B** = CPA control: Cyclophosphamide treated and distilled water administered control mice; **C** = EAP<sub>200</sub>: CPA treated and *A. pullulans* purified exopolymers (EAP at a dose of 200 mg/kg) administered mice; **D** = AR<sub>400</sub>: CPA treated and AR (400 mg/kg) administered mice; **E** = AR<sub>200</sub>: CPA treated and AR (200 mg/kg) administered mice; **F** = AR<sub>100</sub>: CPA treated and AR (100 mg/kg) administered mice; AR = Astragali Radix (Roots of *A. membranaceus* Bunge) extracts; TNF = Tumor necrosis factor; IL = Interleukin; iNOS = Inducible nitric oxide synthases; ABC = Avidin-biotin-peroxidase complex; All ABC-based immunohistochemical stain; Scale bar = 100  $\mu$ m



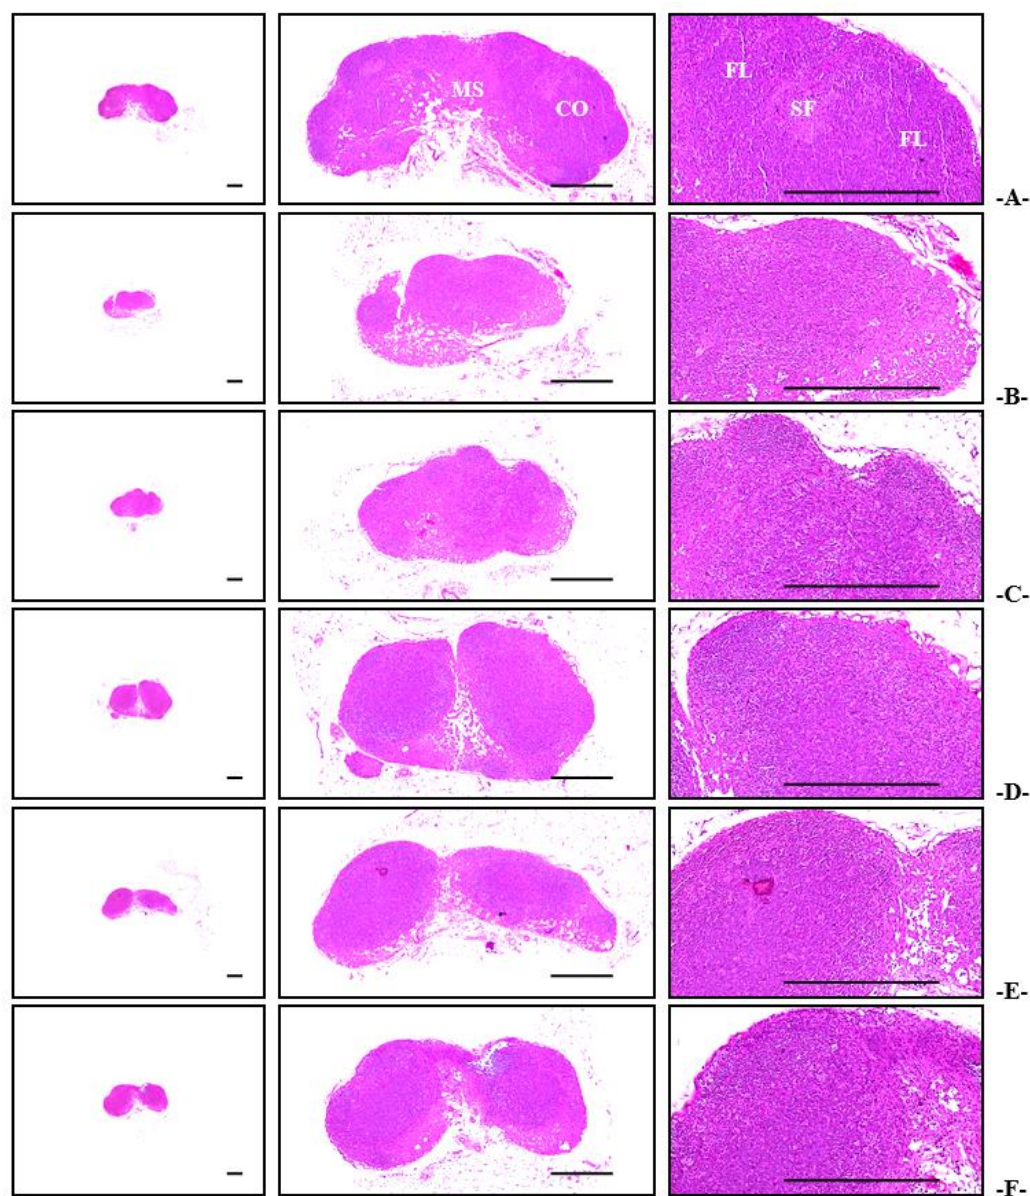

**Figure S5.** Representative histopathological images of the left submandibular LN, taken from intact or CPA-induced immunosuppressed mice.

**A** = Intact vehicle control: Distilled water administered intact mice; **B** = CPA control: Cyclophosphamide treated and distilled water administered control mice; **C** = EAP<sub>200</sub>: CPA treated and *A. pullulans* purified exopolymers (EAP at a dose of 200 mg/kg) administered mice; **D** = AR<sub>400</sub>: CPA treated and AR (400 mg/kg) administered mice; **E** = AR<sub>200</sub>: CPA treated and AR (200 mg/kg) administered mice; **F** = AR<sub>100</sub>: CPA treated and AR (100 mg/kg) administered mice; AR = Astragali Radix (Roots of *A. membranaceus* Bunge) extracts; LN = Lymph node; CO = Cortex; MS = Medullary sinus; SF = Secondary follicle; FL = Follicle; All Hematoxylin and eosin stain; Scale bar = 400  $\mu$ m
